# Supplementary material for: Chromatinization of Escherichia coli with archaeal histones
Source: eLife journal article supplement (doi:10.7554/elife.49038), 2019-11-06
Supplement: supp [file elife_poa_e49038_Figure_1_figure_supplement_2.pdf › elife_poa_e49038_Figure_1_figure_supplement_2.pdf]

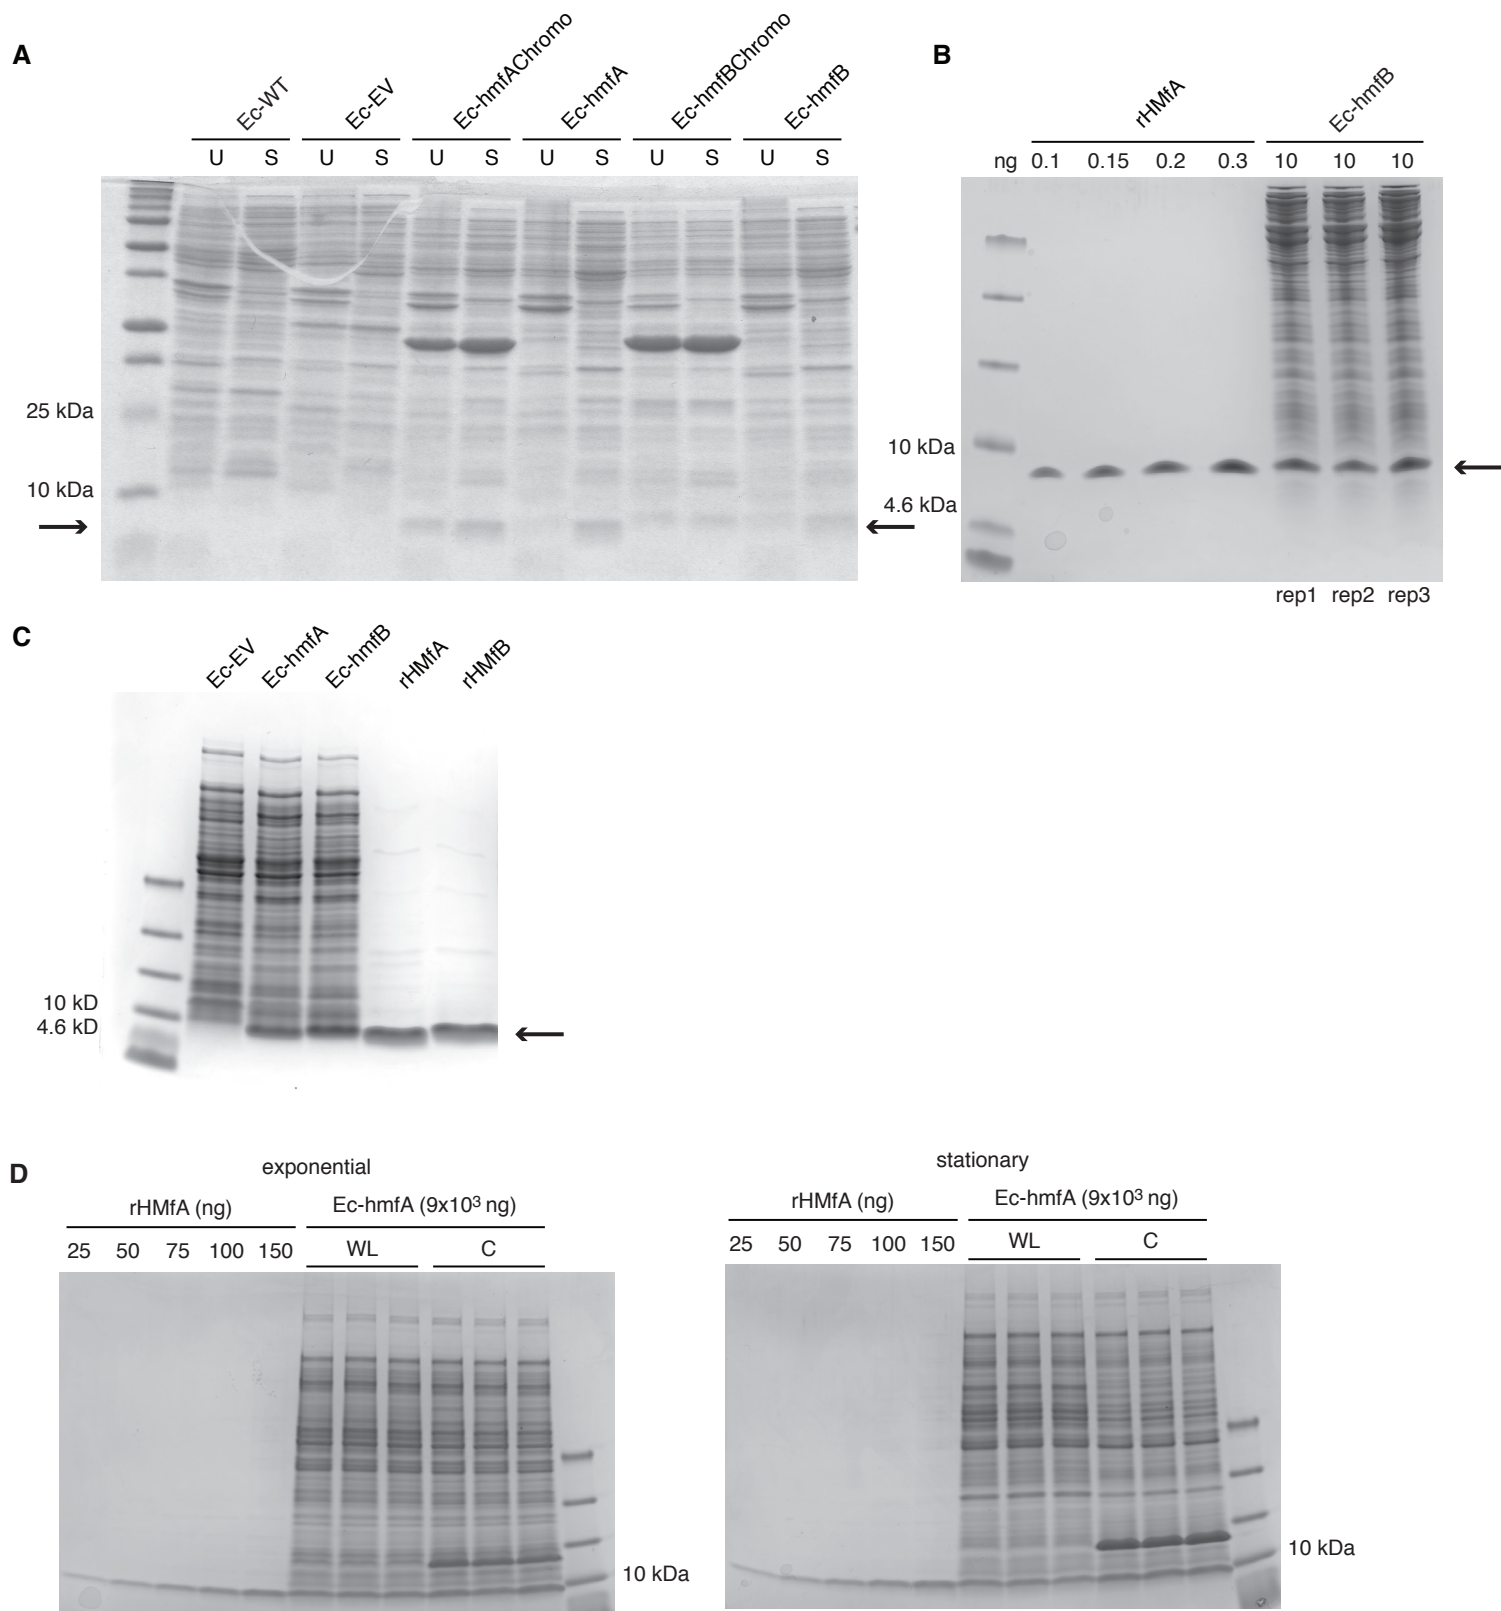

**Figure 1 - figure supplement 2. Detection and quantification of HMf expression in *E. coli*.** **A.** Polyacrilamide gel comparing soluble (S) and unsoluble (U) fractions obtained by lysis of transformant strains (Ec-EV, Ec-hmfA, Ec-hmfB) and wild type *E. coli* (Ec-WT). Ec-hmfAChromo and Ec-hmfBChromo are histone-expressing strains that also bear a chromogenic protein. These were not further analyzed in this study (see Methods). **B.** HMfA/B protein levels in the transformant strain was estimated from SDS-PAGE bands by densitometry. 10ng of cell lysate was loaded onto a precast tris-tricine gel and the intensity of the band corresponding to HMfB (arrow) was compared to a standard curve made with increasing amounts of purified recombinant rHMfA (see Methods). **C.** Tris-tricine gel showing HMfA and HMfB expression in the soluble fraction of cell lysate and after Heparin-column purification. Ec-EV is included as negative control. **D.** As in B. but quantifying both chromatin fraction (C) and whole cell lysate (WL). 9µg of whole cell lysate and chromatin fraction (see Methods) were loaded in triplicate and the intensity of the band corresponding to HMfA was compared to a standard curve made with increasing amounts of purified recombinant rHMfA. The same initial number of cells was harvested 2 hrs post induction (left panel) and ~17 hrs post induction (right panel). The pronounced band visible in C but not WL corresponds to lysozyme.
