# Supplementary material for: Chromatinization of Escherichia coli with archaeal histones
Source: eLife journal article supplement (doi:10.7554/elife.49038), 2019-11-06
Supplement: supp [file elife_poa_e49038_Figure_4_figure_supplement_1.pdf › elife_poa_e49038_Figure_4_figure_supplement_1.pdf]

**A**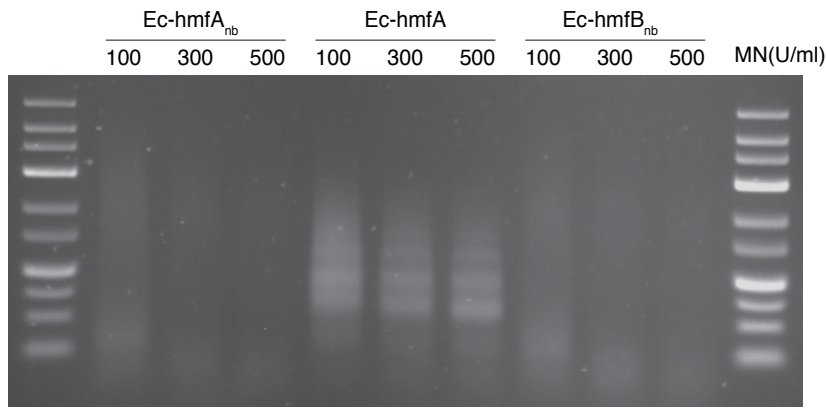**B**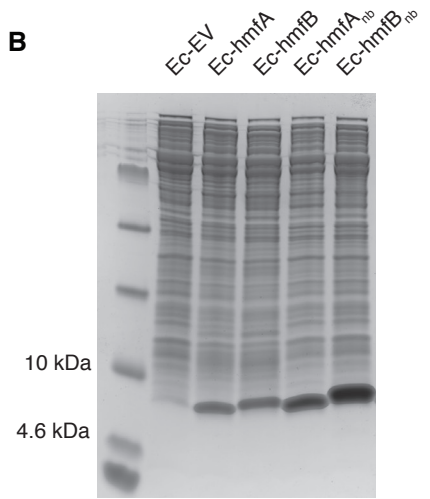

**Figure 4 - figure supplement 1. Expression of non-binding histone mutants.** **A.** Agarose gel comparing the MNase digestion profiles of Ec-hmfA to strains expressing non-binding HMfA and HMfB mutants **B.** Coomassie staining of the soluble fractions of cell lysates from all transformant strains discussed in this study. Note that non-binding histone variants are - for unknown reasons - more highly expressed than their DNA-binding progenitors and might, by virtue of this higher expression and their different sequence, trigger qualitatively and quantitatively different responses. This makes an indirect comparison (comparing Ec-hmfA/B to Ec-EV after factoring out shared responses with Ec-hmfA<sub>nb</sub>/B<sub>nb</sub> versus Ec-EV, as described in the main text) preferable to directly comparing differential expression in Ec-hmfA/B versus Ec-hmfA<sub>nb</sub>/B<sub>nb</sub>.
