# Supplementary material for: Chromatinization of Escherichia coli with archaeal histones
Source: eLife journal article supplement (doi:10.7554/elife.49038), 2019-11-06
Supplement: supp [file elife_poa_e49038_Figure_4_figure_supplement_2.pdf › elife_poa_e49038_Figure_4_figure_supplement_2.pdf]

**A**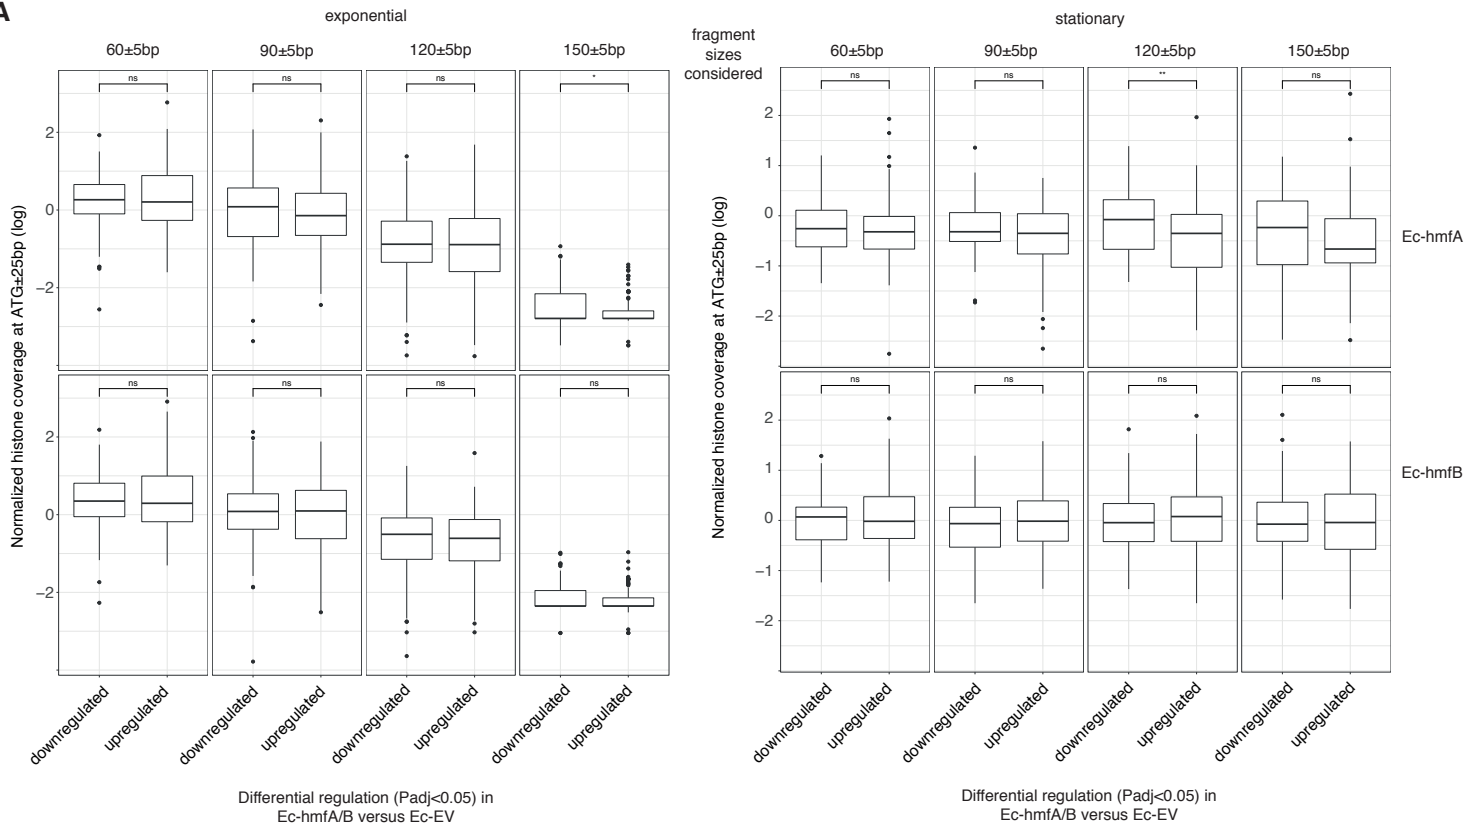**B**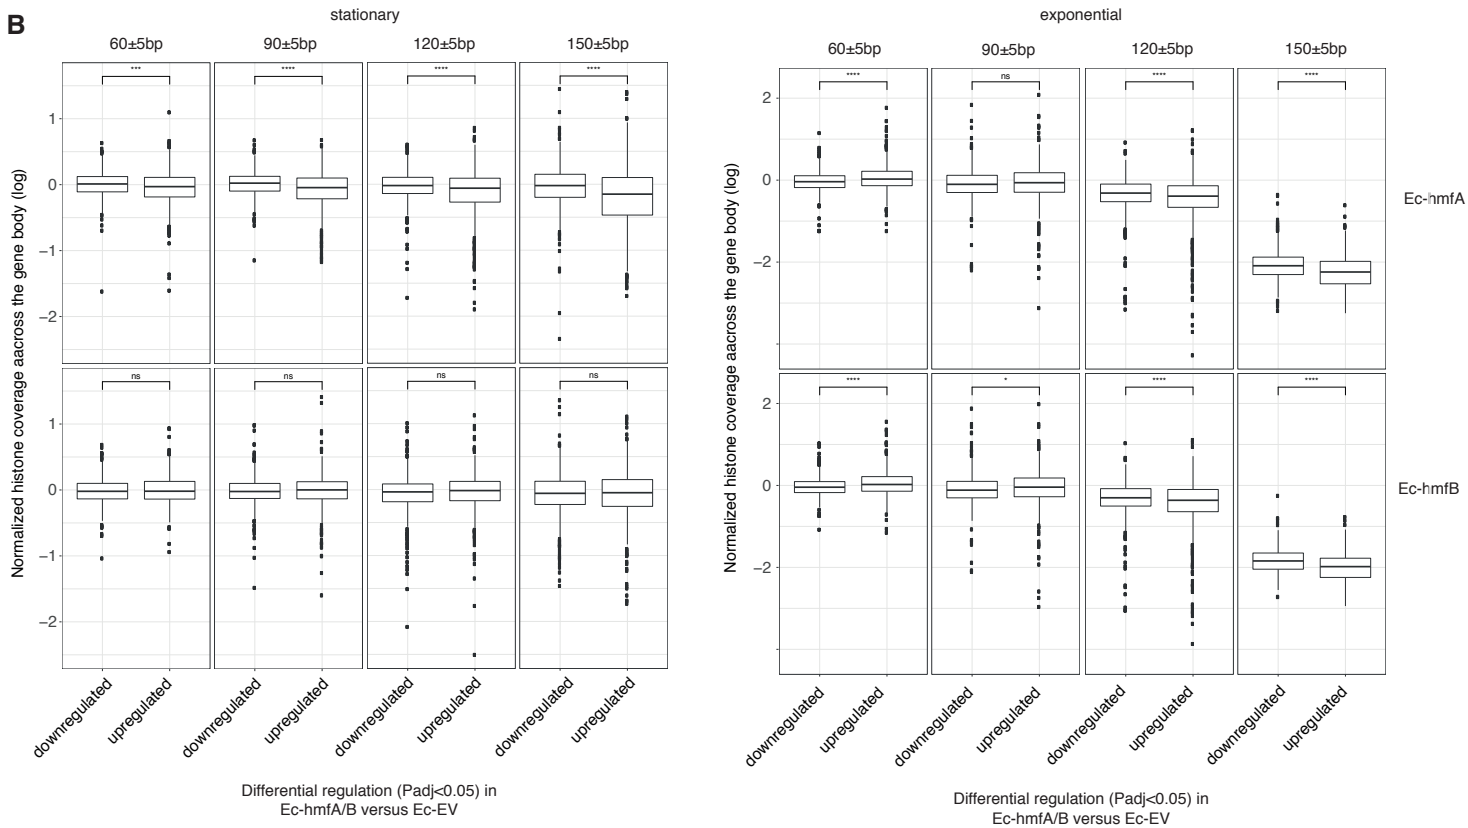

**Figure 4 - figure supplement 2. The impact of archaeal histones in *E. coli* on transcription. A.** Reduced transcript abundance in histone-expressing strains is not associated with higher average histone occupancy around the ATG (±25bp). Only 5' genes in operons that are represented in Figure 4A are considered in this analysis, to enable a fair comparison between occupancy at transcription and translation start sites. **B.** Histone occupancy across the gene body for genes that are significantly up- or down-regulated in histone-expressing strains. \*\*\*\*P<0.001; \*\*\*P<0.005; \*\*P<0.01; \*P<0.05; expo: exponential phase; stat: stationary phase.
