# Supplementary material for: Chromatinization of Escherichia coli with archaeal histones
Source: eLife journal article supplement (doi:10.7554/elife.49038), 2019-11-06
Supplement: supp [file elife_poa_e49038_Figure_4_figure_supplement_3.pdf › elife_poa_e49038_Figure_4_figure_supplement_3.pdf]

**A**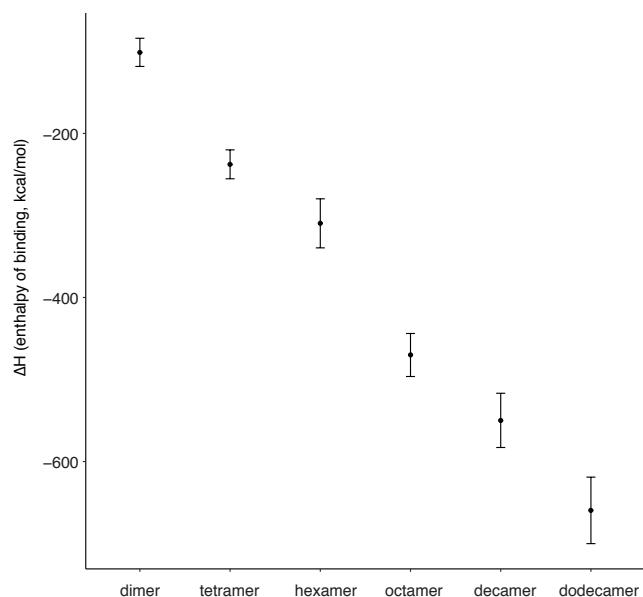**B**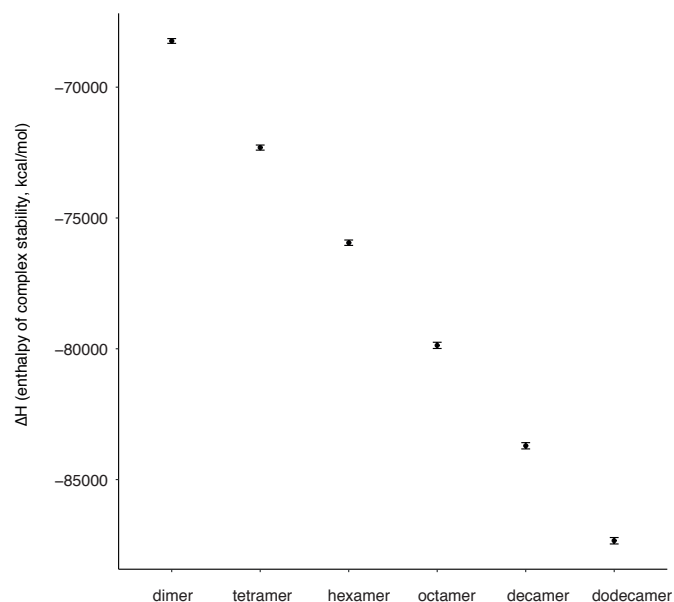

**Figure 4 - figure supplement 3. Longer oligomeric histone-DNA complexes are more stable and have higher DNA affinity. (A)** DNA binding affinity and **(B)** complex stability of different histone-DNA complexes of different length, measured as the change in enthalpy ( $\Delta H$ , see Methods) in molecular dynamics simulations based on the hexameric HMfB:DNA crystal structure (PDB ID: 5t5k).
