# Supplementary material for: Chromatinization of Escherichia coli with archaeal histones
Source: eLife journal article supplement (doi:10.7554/elife.49038), 2019-11-06
Supplement: supp [file elife_poa_e49038_Figure_5_figure_supplement_1.pdf › elife_poa_e49038_Figure_5_figure_supplement_1.pdf]

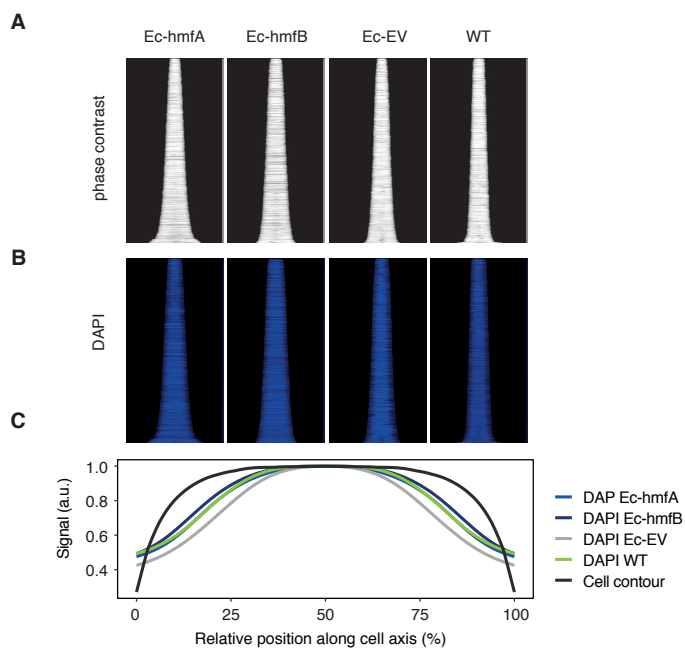

**Figure 5 - figure supplement 1. No evidence for altered nucleoid/cytoplasm ratio in histone-expressing cells.**

Ordered arrays of **(A)** cell sizes, as determined by phase contrast microscopy, and **(B)** DAPI-stained nucleoids in different *E. coli* strains. **C.** Averaged cell contour and DAPI signals are very similar across strains. Averaging was carried out within a size range ( $1\mu\text{m}$ - $2.5\mu\text{m}$ ) well populated by both Ec-EV and Ec-hmfA/B to ensure that differences are not driven by different cell size distributions. See Methods for details on image quantification.
