# Supplementary figures and images for: Chromatinization of Escherichia coli with archaeal histones
Source: eLife journal article supplement (doi:10.7554/elife.49038), 2019-11-06

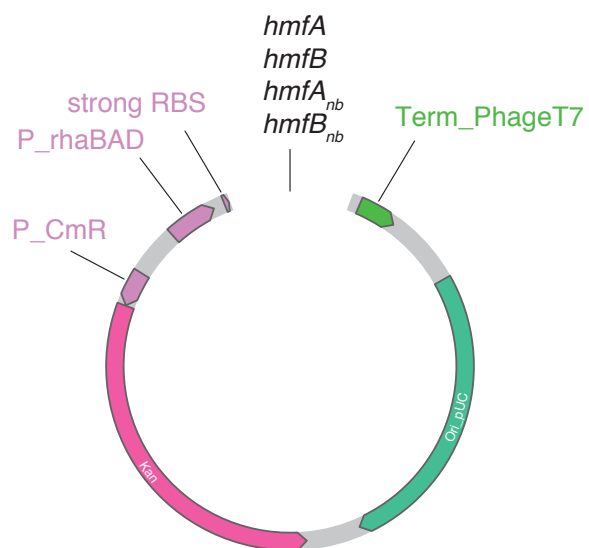

**Figure 1 - figure supplement 1. Layout of pD681-derived plasmids used in this study**

Supplement: supp [file elife_poa_e49038_Figure_1_figure_supplement_1.pdf › elife_poa_e49038_Figure_1_figure_supplement_1.pdf]
